# Supplementary material for: Investigation of the Storage and Stability as Well as the Dissolution Rate of Novel Ilaprazole/Xylitol Cocrystal
Source: Preprints.org preprint supplement (doi:10.20944/preprints202401.0270.v1), 2024-01-04
Supplement: Supplementary file 1 [file supplementary]

**Supporting Information**


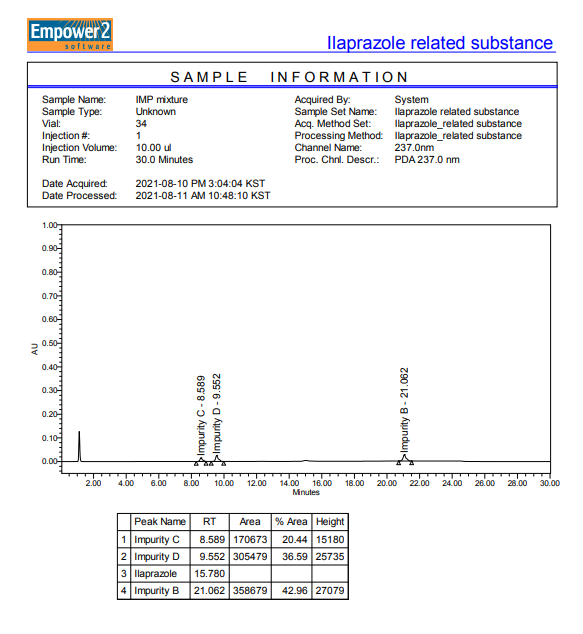


Ilaprazole sulfur ether (impurity B)

**Figure S1.** Shows the chromatogram of Ilaprazole (Ila) impurity obtained through High-performance liquid chromatography (HPLC) analysis, depicting the retention time (RT). (RT: 21.062min)


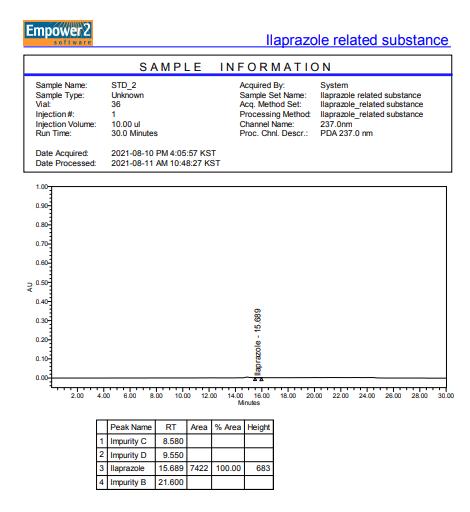


**Figure S2.** Shows the chromatogram of Ilaprazole (Ila) obtained through High-performance liquid chromatography (HPLC) analysis, depicting the retention time (RT). (RT: 15.689min)

(a) (b)

(c) (d)

(e)

**Figure S3.** The molecular structures of the coformers presented in Table 1.

Figure S4. PXRD pattern of Ila, Meg, Ila/Meg physical mixture and Ila/Meg obtained by co-crystallization.

Ila

Meg

Mixture

Ila/Meg

Angle [2θ]

Ila

Mixture

Nic

Ila/Nic

Angle [2θ]

**Figure S5.** PXRD pattern of Ila, Nic, Ila/Nic physical mixture and Ila/Nic obtained by co-crystallization.

**Figure S6.** Solution-state 1H-NMR of Ilaprazole (Ila) (solvent: DMSO-d6) (Hydrogen numbering for each peak has been completed.)

**Figure S7.** Solution-state 13C-NMR of Ilaprazole (Ila) (solvent: DMSO-d6) (Carbon numbering for each peak has been completed.)


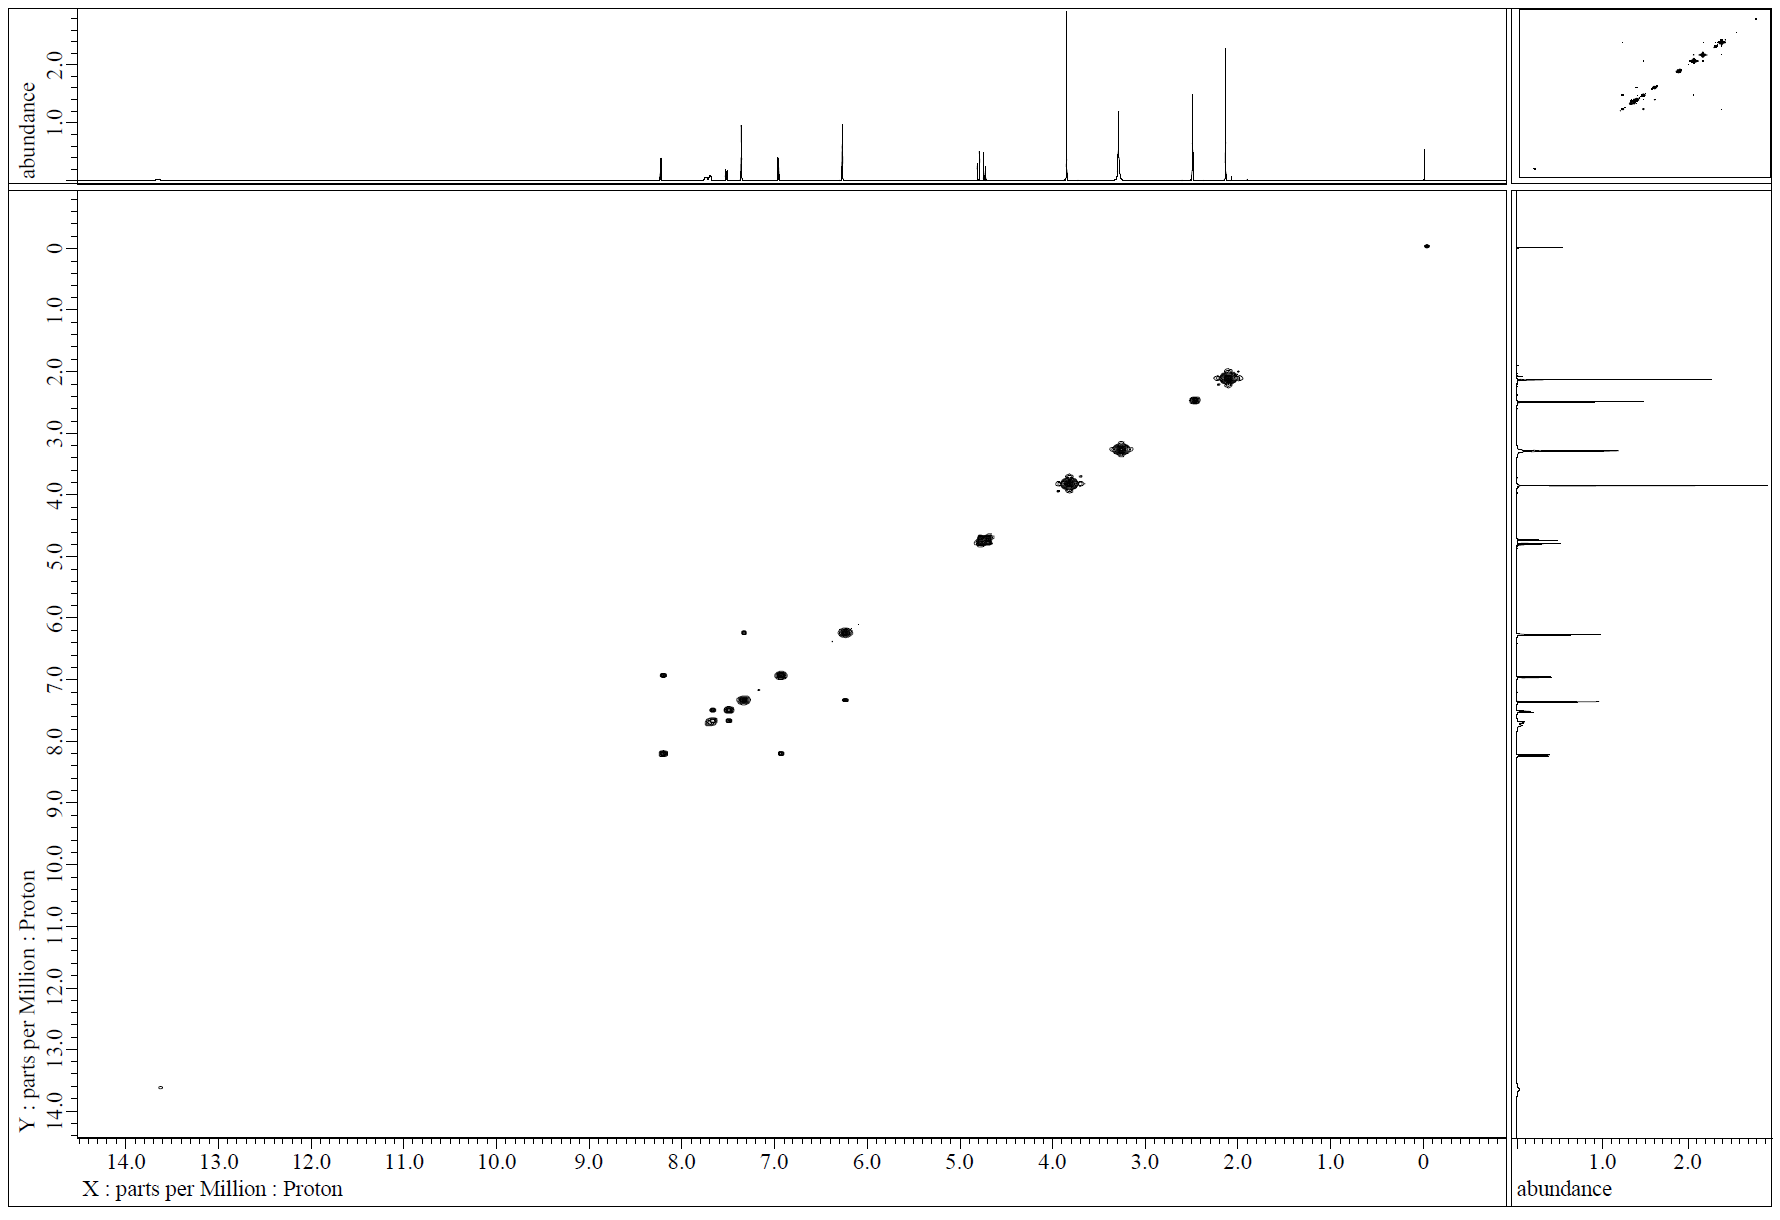


**Figure S8.** Solution-state 2D NMR (1H-1H COSY) of Ilaprazole (Ila)


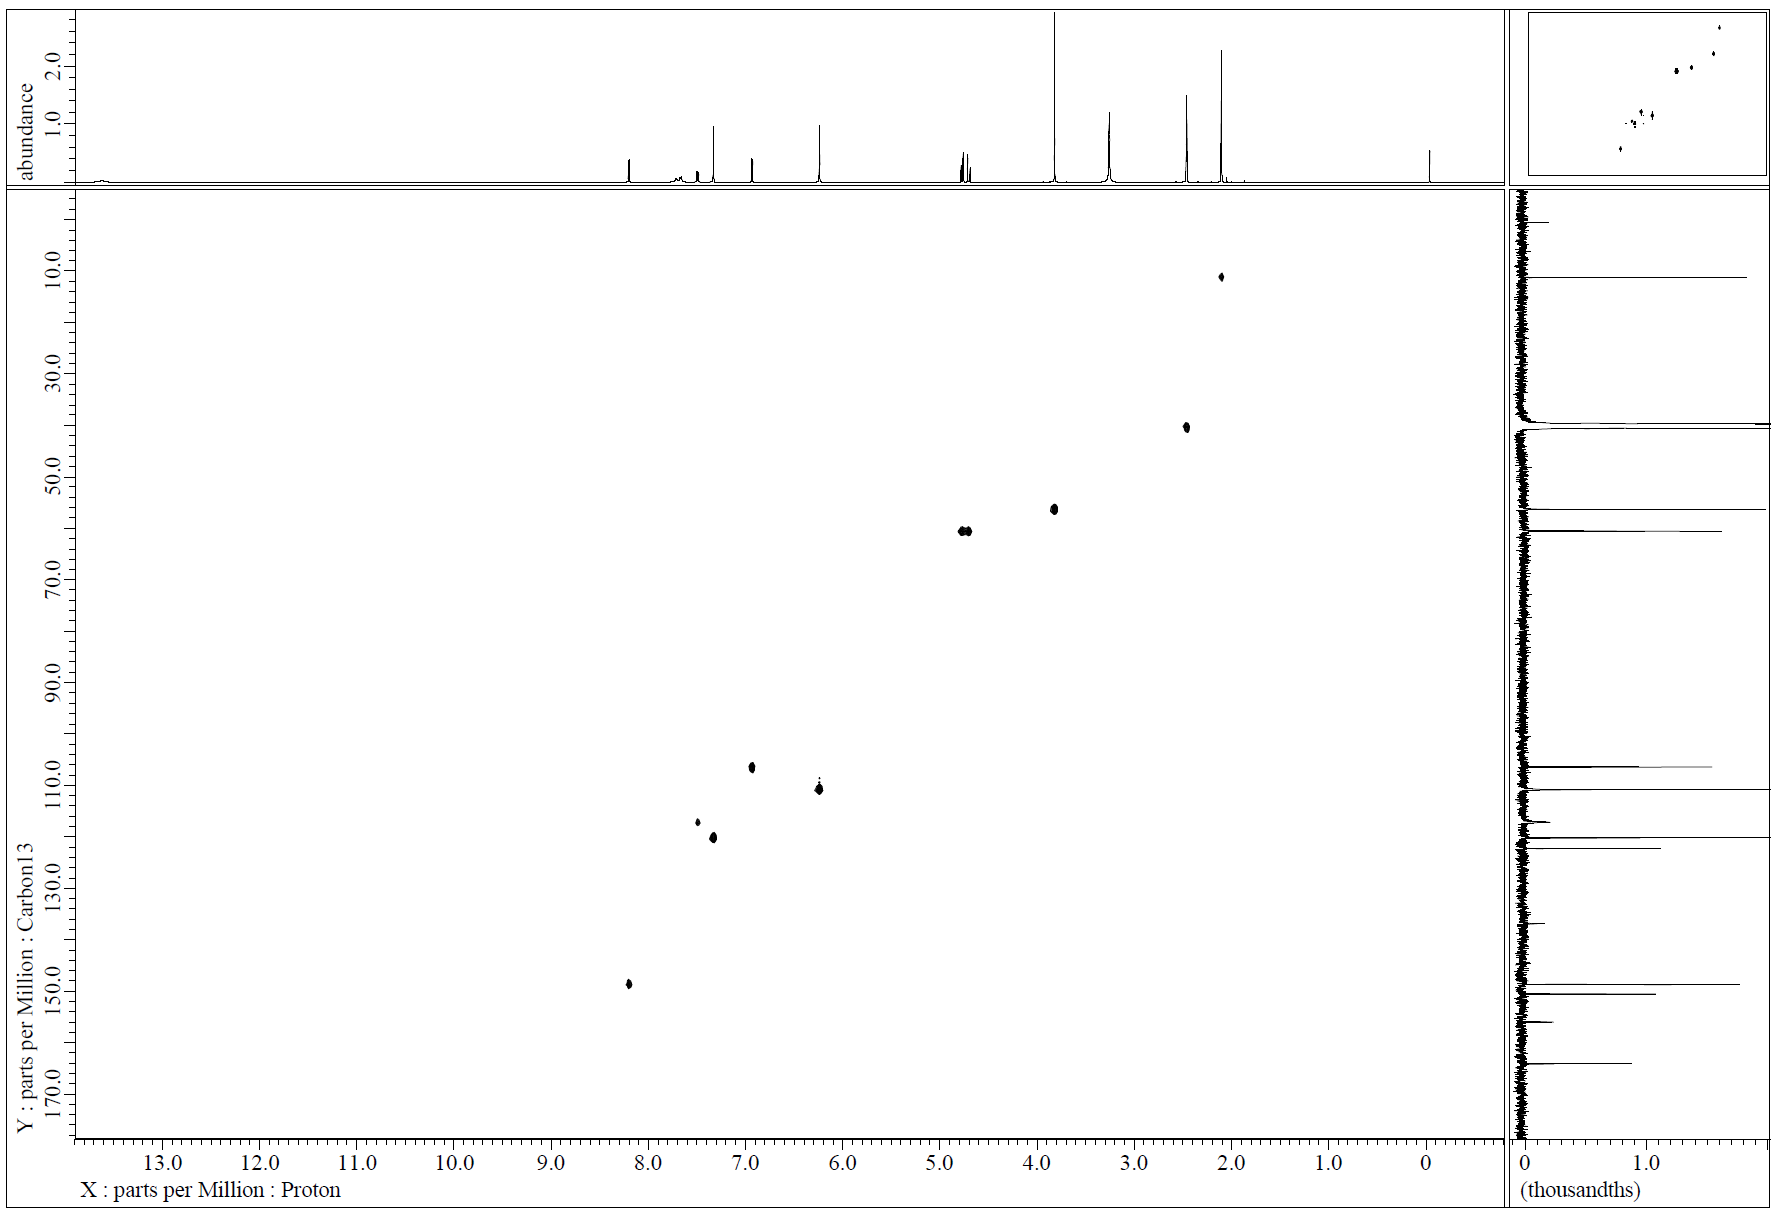


**Figure S9.** Solution-state 2D NMR (1H-13C HSQC) of Ilaprazole (Ila)


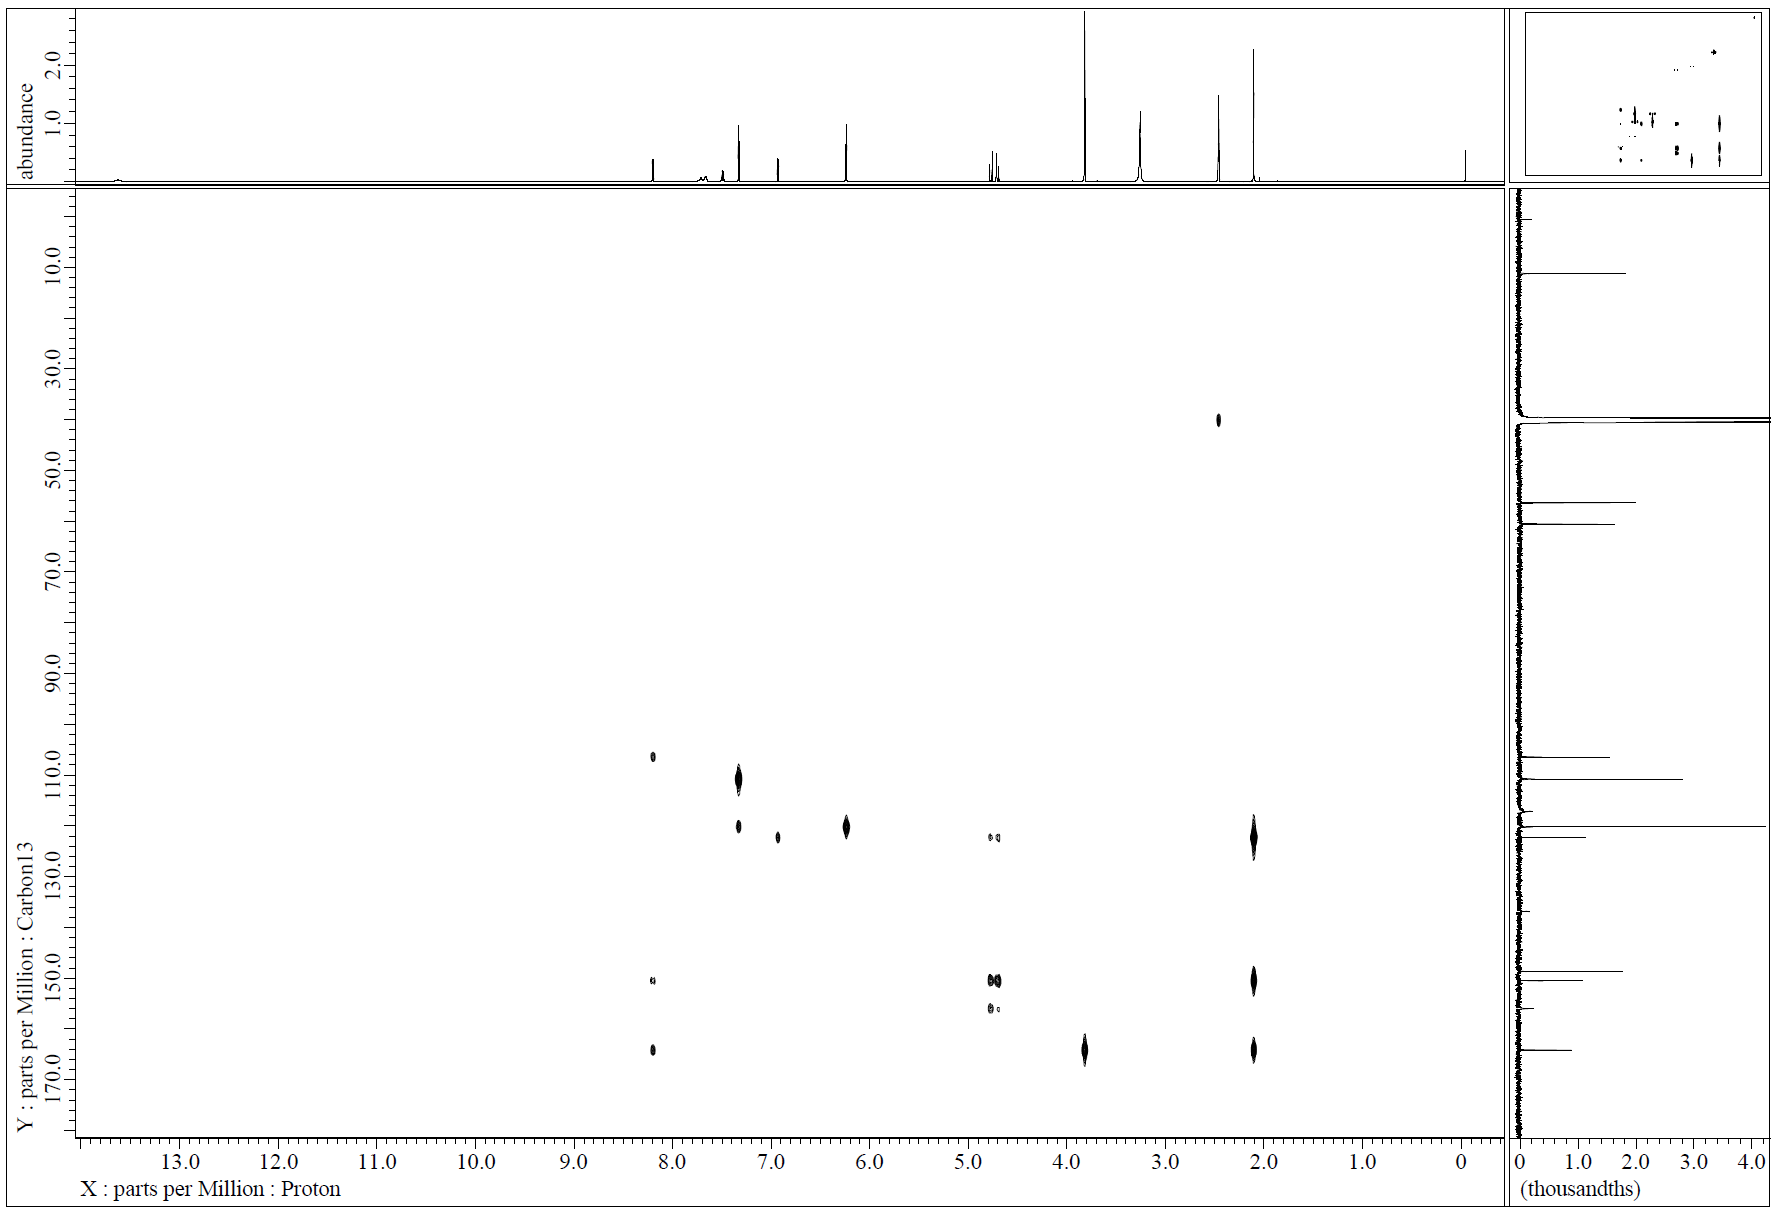


**Figure S10.** Solution-state 2D NMR (1H-13C HMBC) of Ilaprazole (Ila)

Figure S11. Solution-state 1H-NMR of Xylitol (Xyl) (solvent: DMSO-d6) (Hydrogen numbering for each peak has been completed.)

Figure S12. Solution-state 13C-NMR of Xylitol (Xyl) (solvent: DMSO-d6) (Hydrogen numbering for each peak has been completed.)


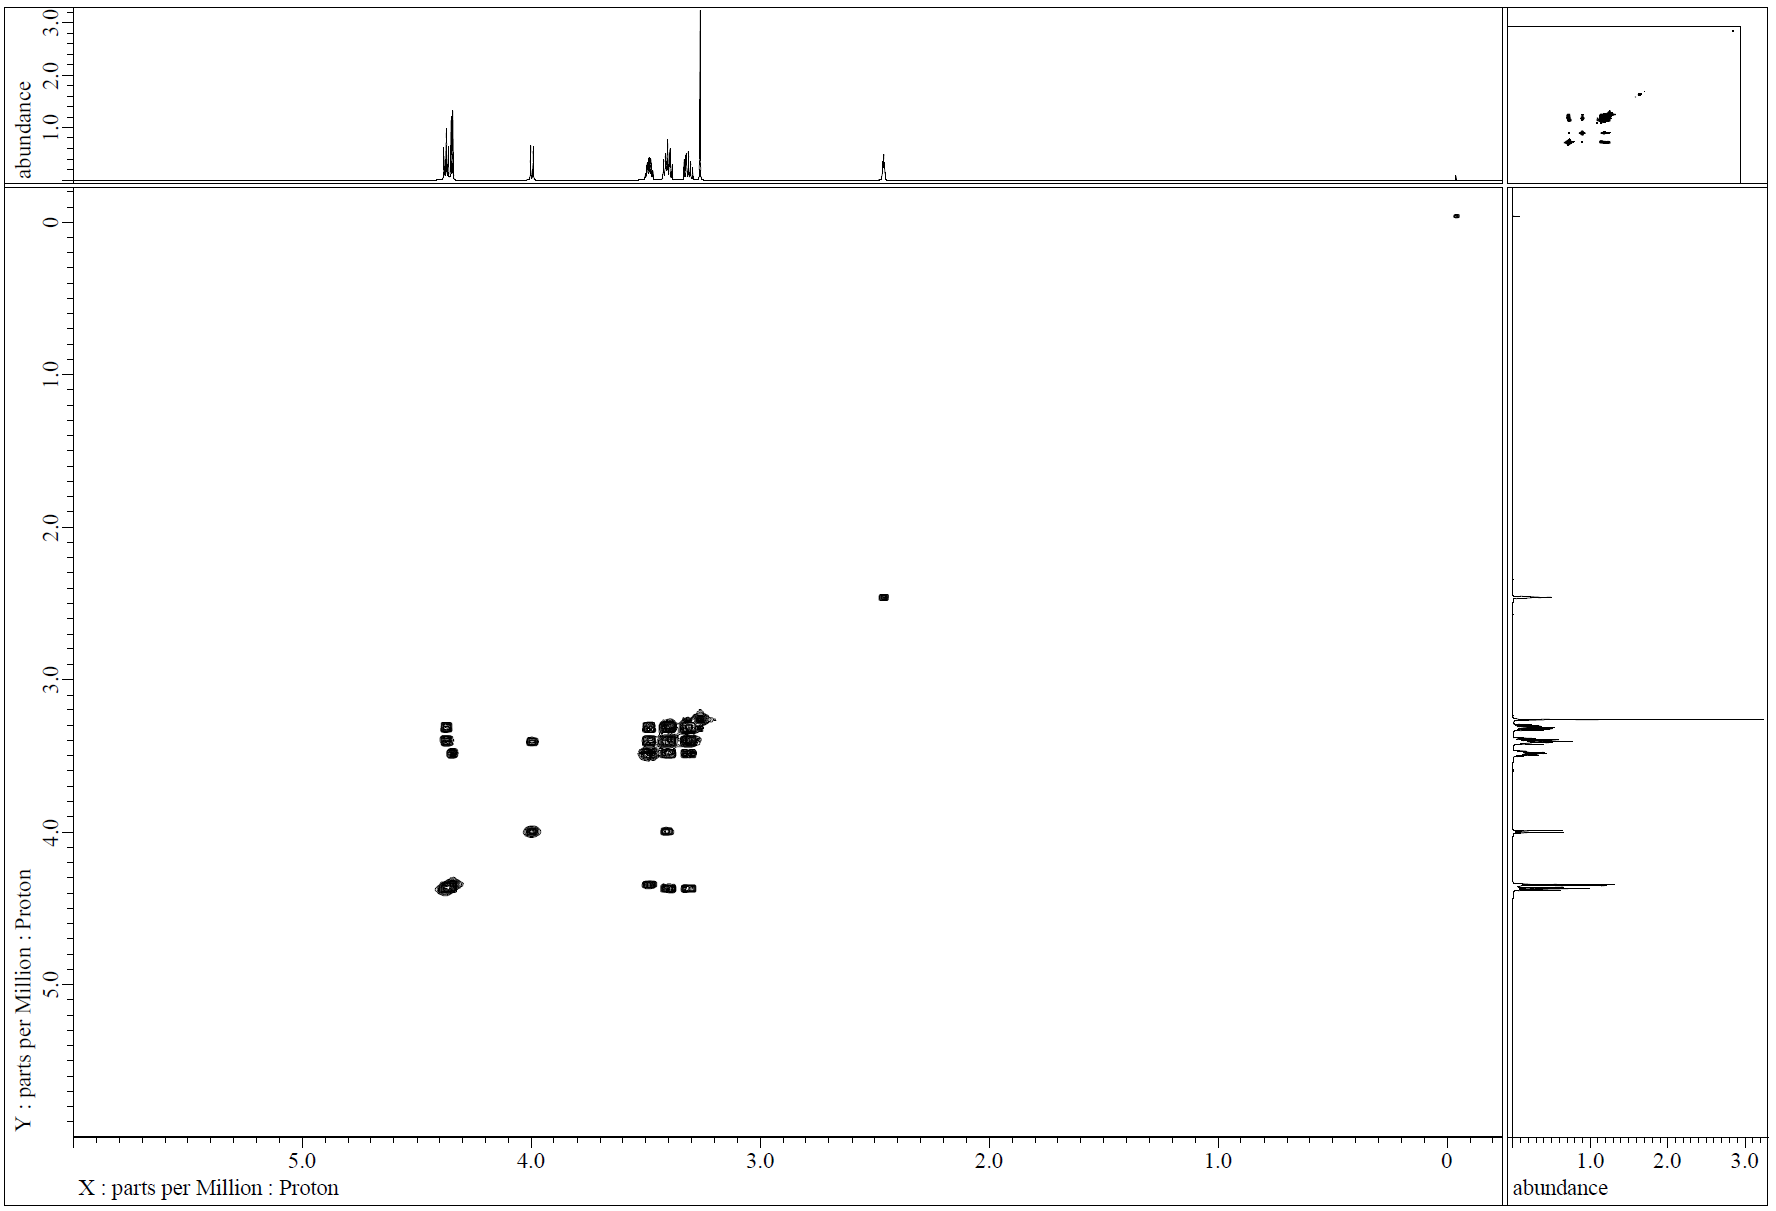


Figure S13. Solution-state 2D NMR (1H-1H COSY) of Xylitol (Xyl)


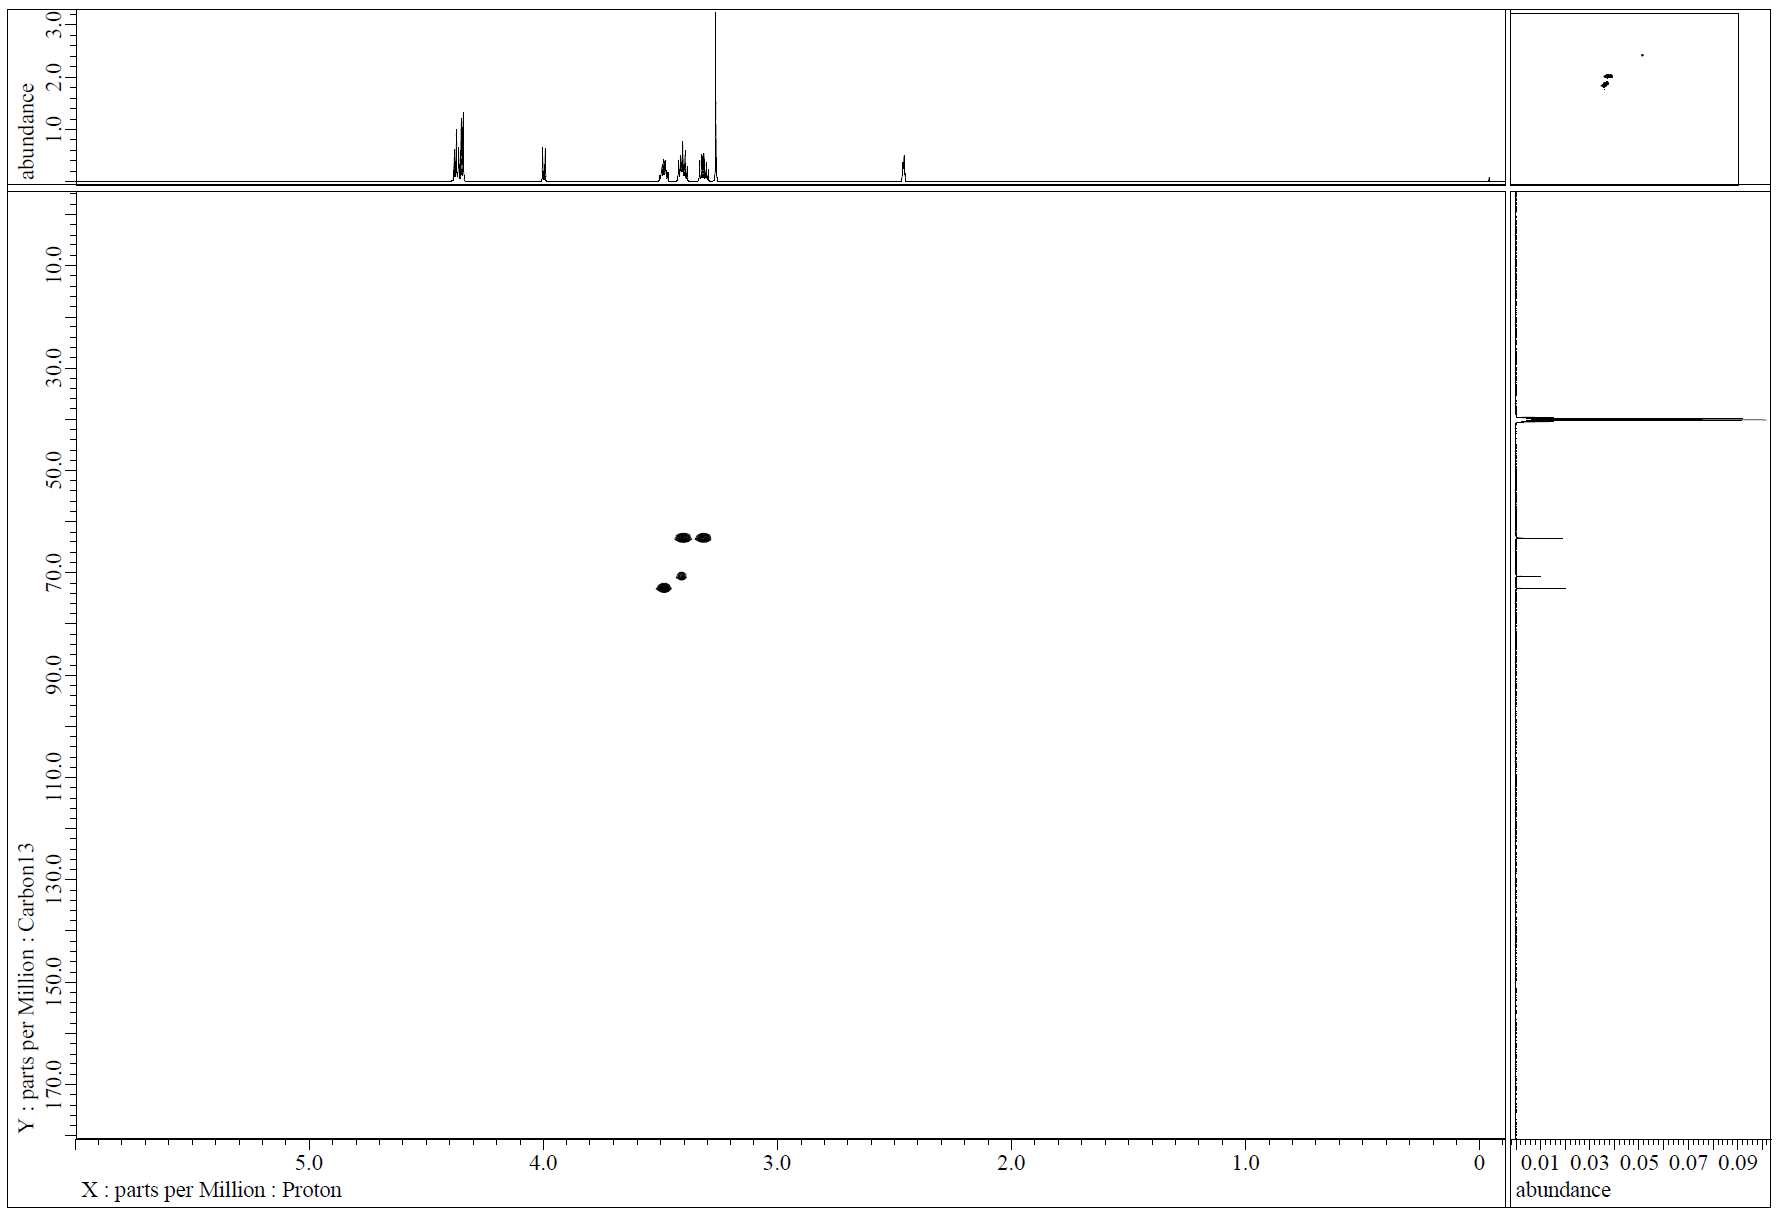


Figure S14. Solution-state 2D NMR (1H-13C HSQC) of Xylitol (Xyl)


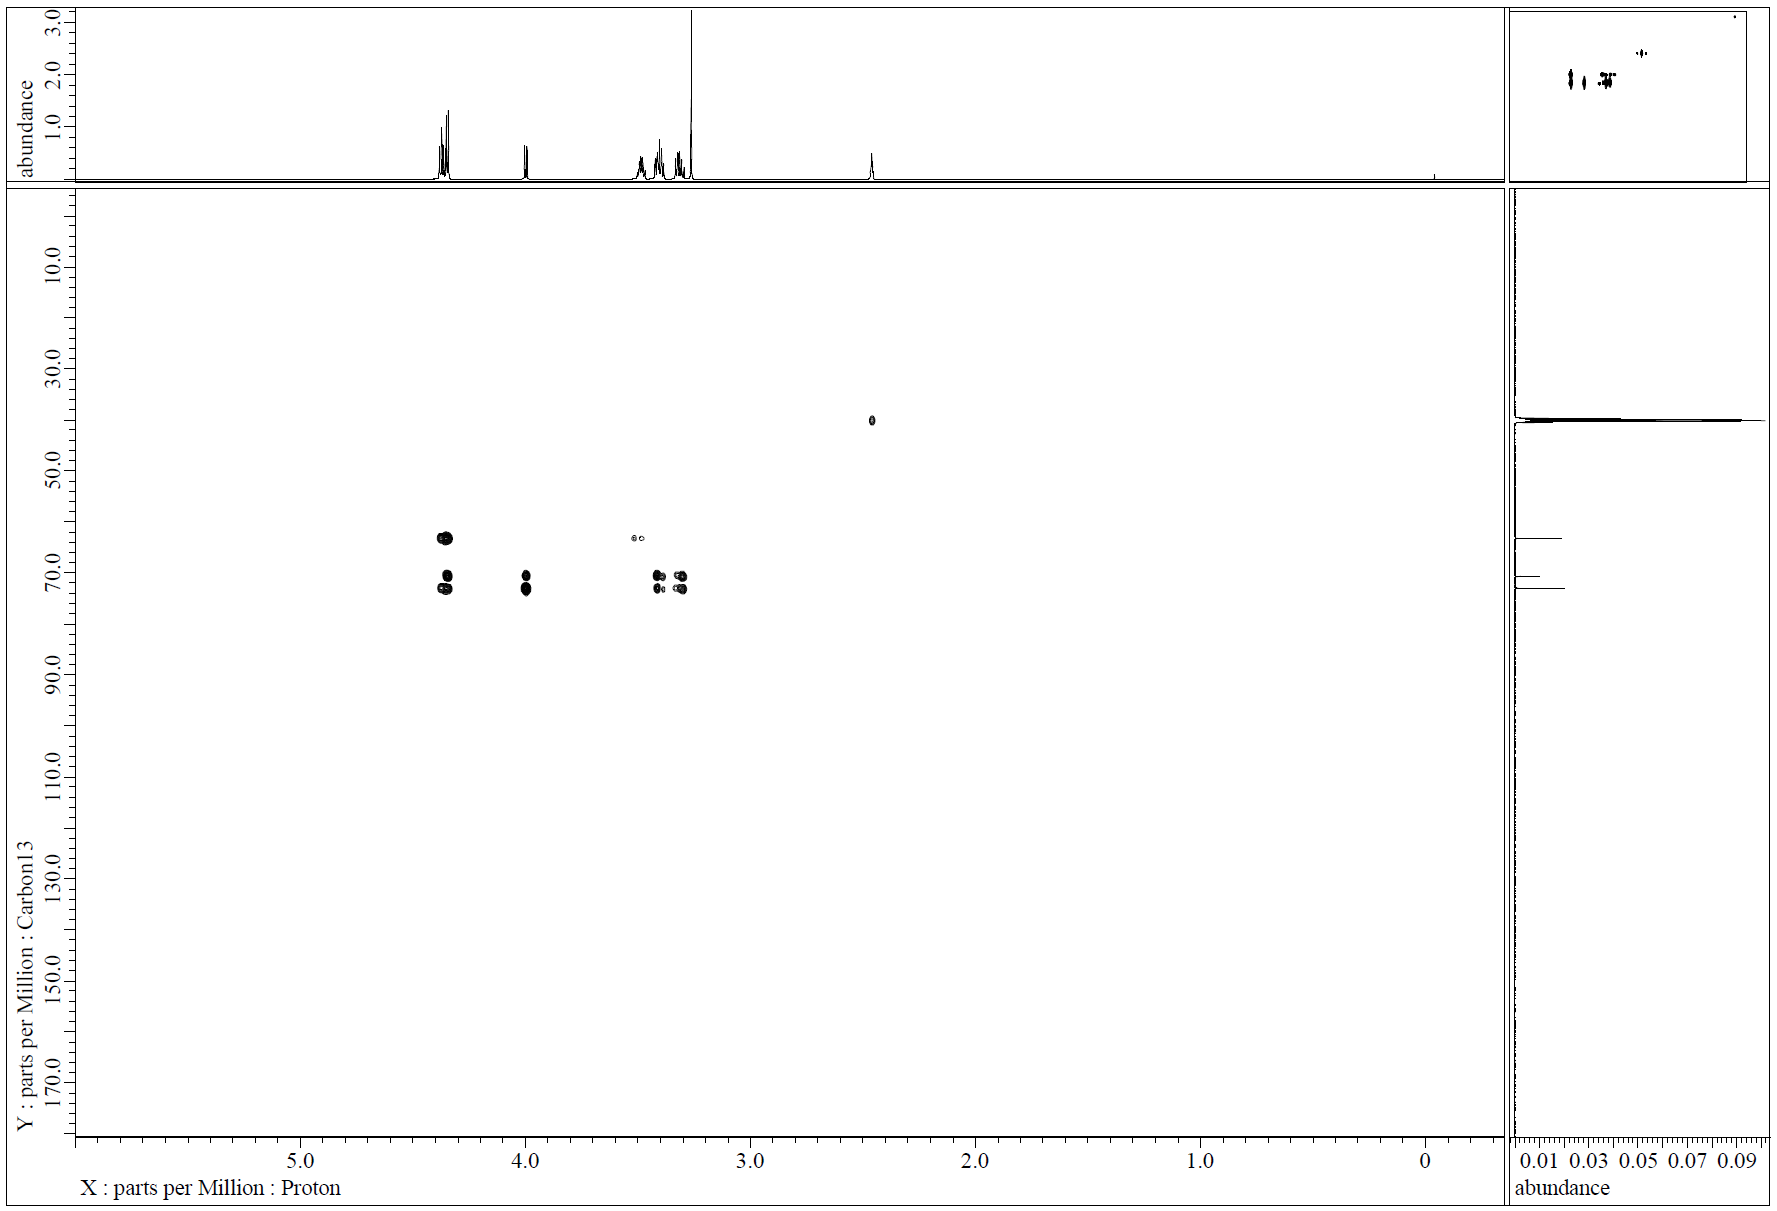


Figure S15. Solution-state 2D NMR (1H-13C HMBC) of Xylitol (Xyl)

Figure S16. Solution-state 1H-NMR of Ila/Xyl cocrystal (solvent: DMSO-d6)

Figure S17. Solution-state 13C-NMR of Ila/Xyl cocrystal (solvent: DMSO-d6)


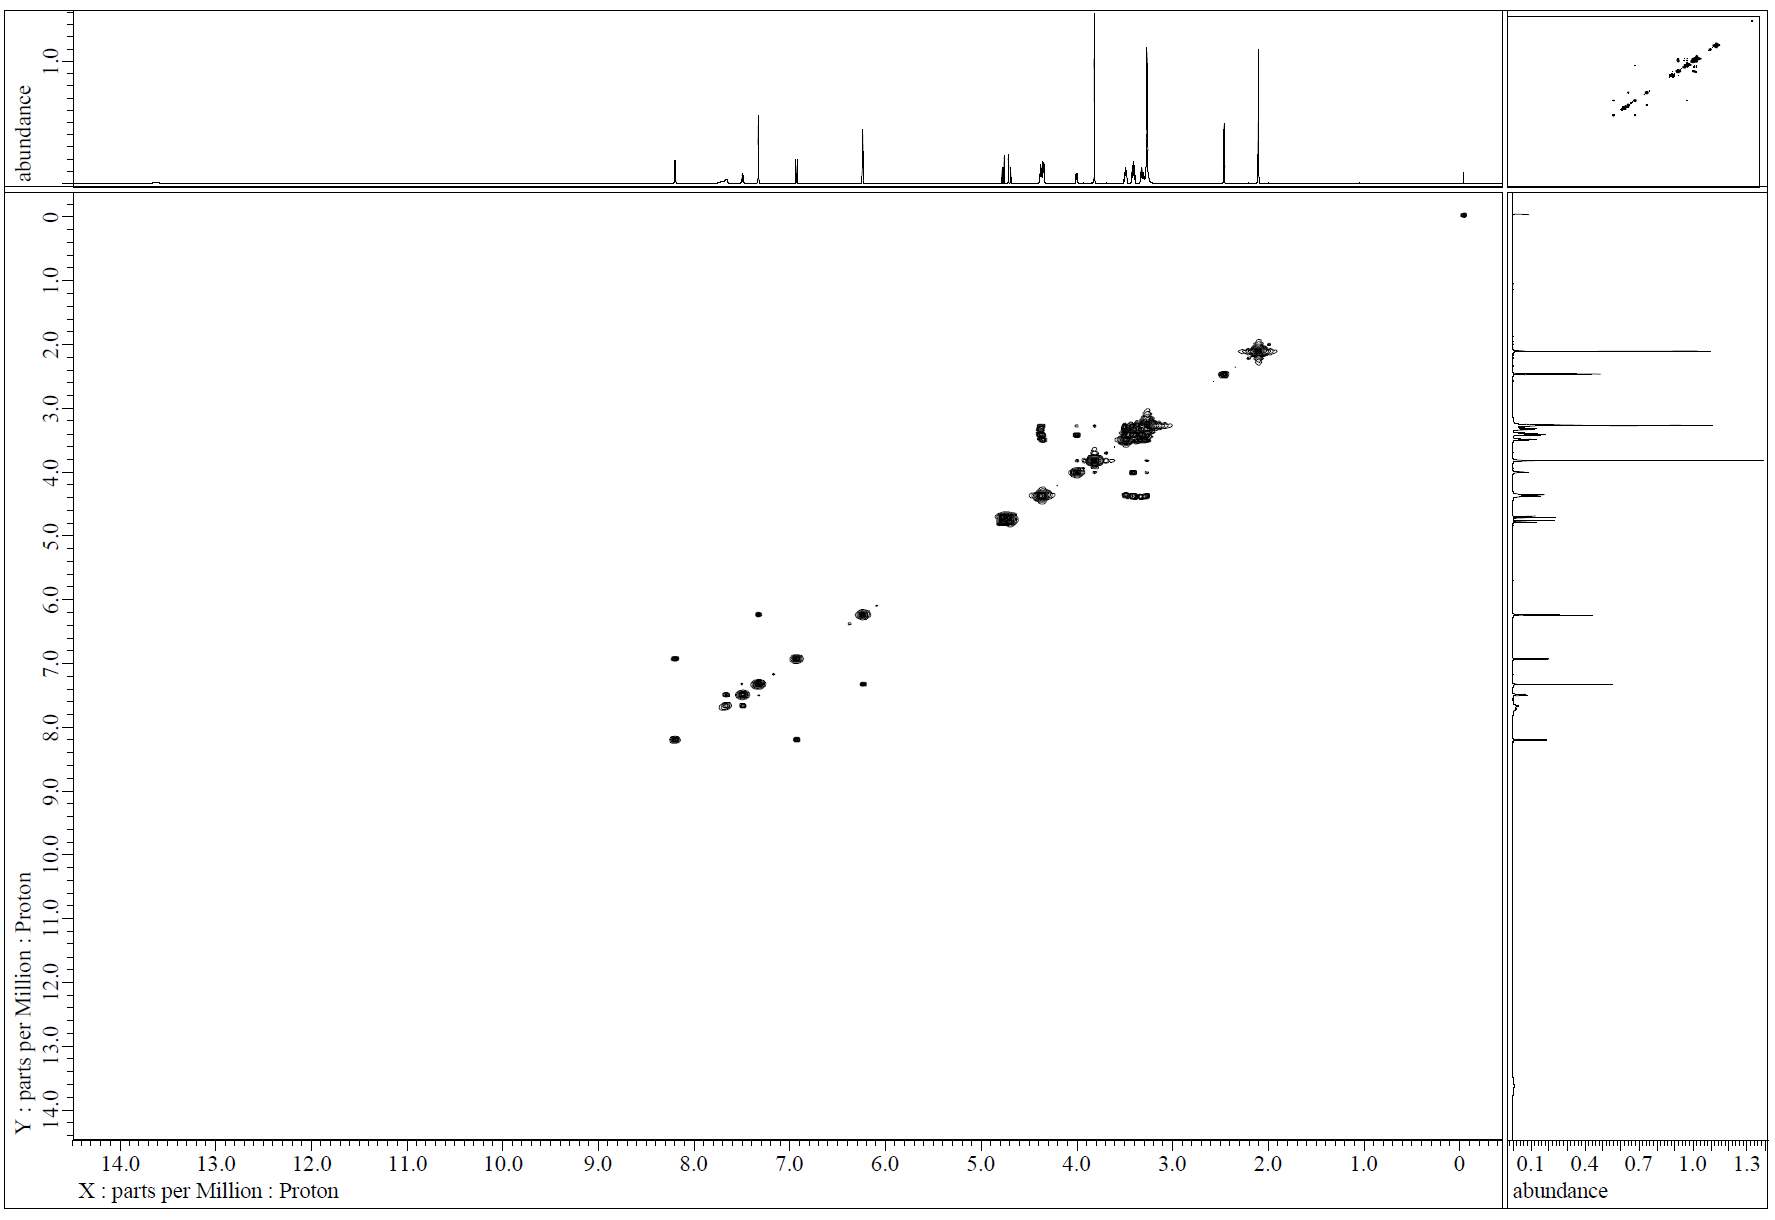


Figure S18. Solution-state 2D NMR (1H-1H COSY) of Ila/Xyl cocrystal


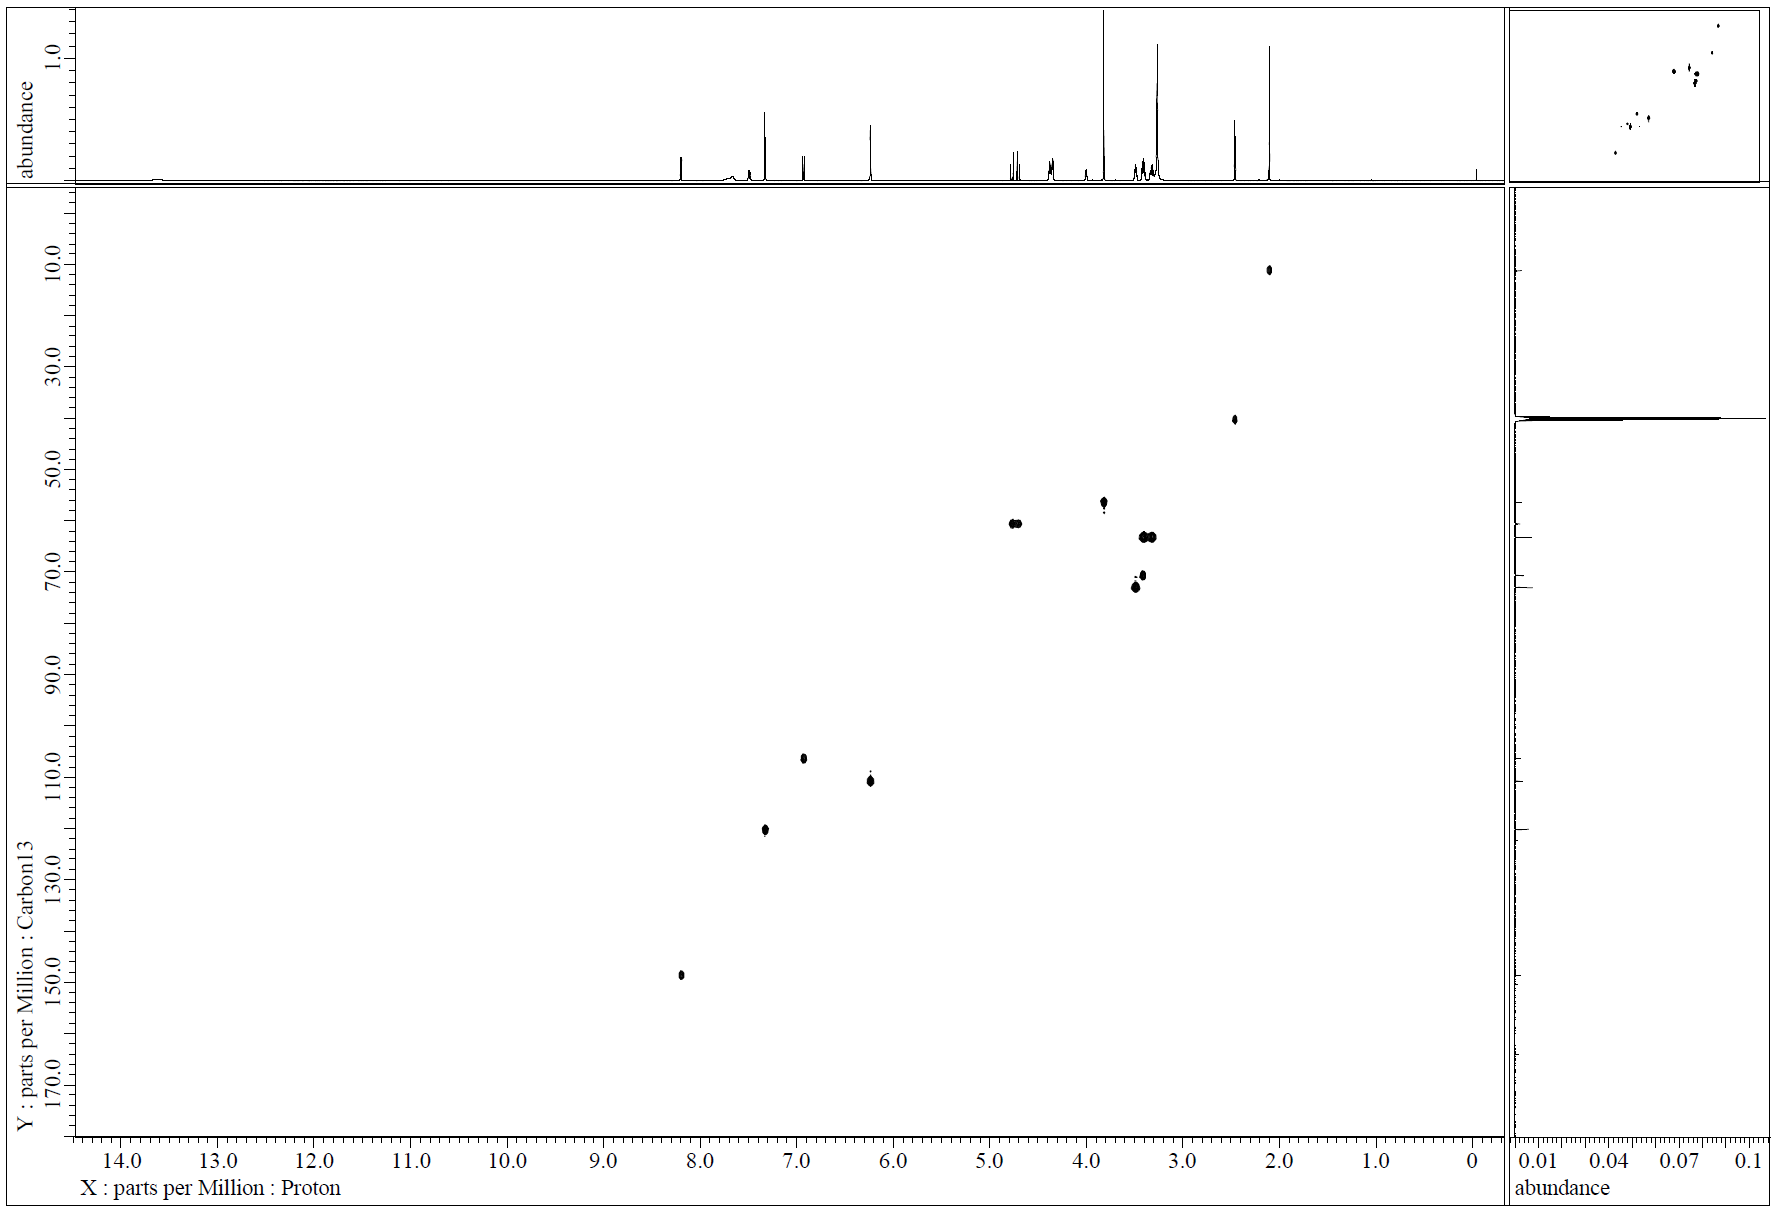


Figure S19. Solution-state 2D NMR (1H-13C HSQC) of Ila/Xyl cocrystal


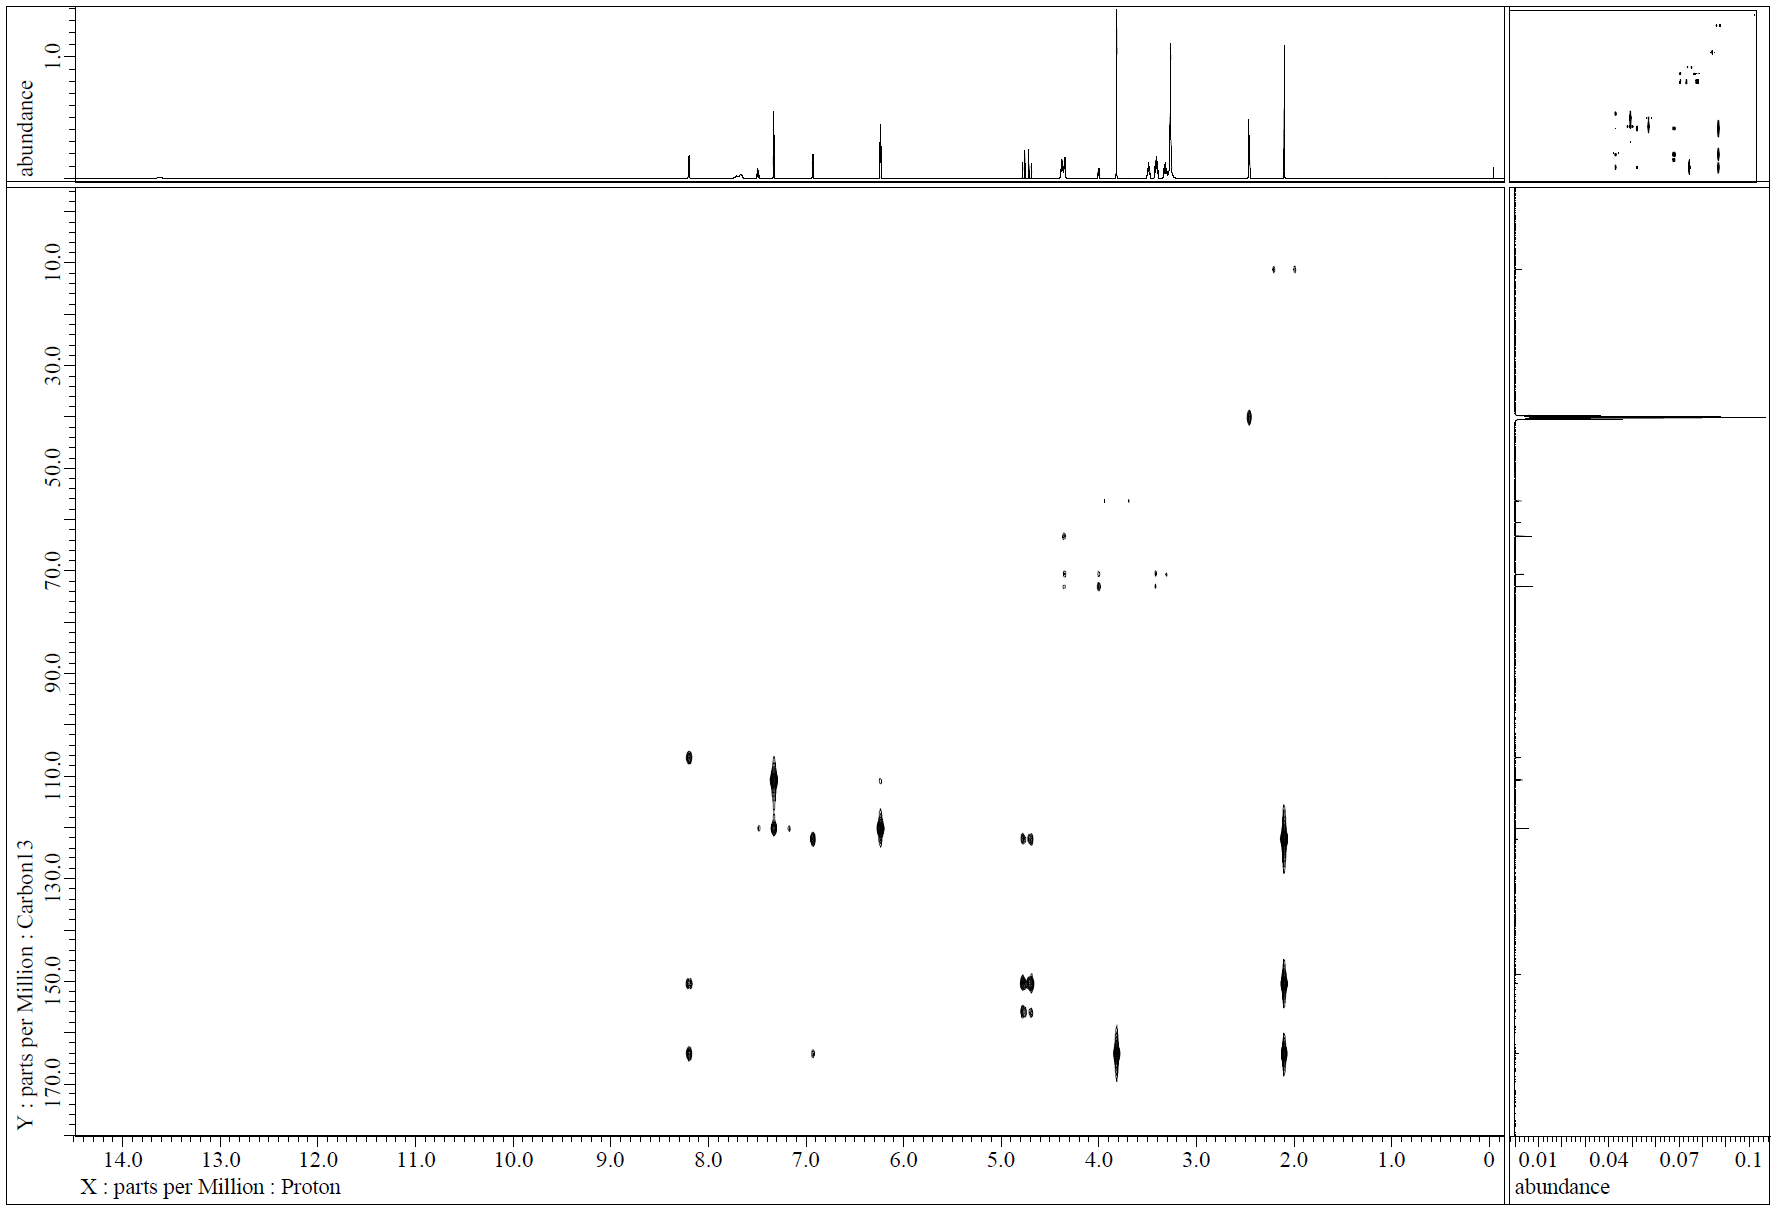


Figure S20. Solution-state 2D NMR (1H-13C HMBC) of Ila/Xyl cocrystal
